# Supplementary material
Source: HighWire-hosted journal article supplement (https://bjgpopen.org/content/suppl/2022/10/13/BJGPO.2022.0126)
Supplement: Brauer_BJGPO.2022.0126_Supp.pdf [file Brauer_BJGPO.2022.0126_Supp.pdf]

Table S1: Medical Read Codes Indicating Menopause:

| Read Code | Description                                              |
|-----------|----------------------------------------------------------|
| 67I1.00   | Advice about the menopause                               |
| ZG61.00   | Advice about the menopause                               |
| K5A4.00   | Artificial menopause state                               |
| C163400   | Early menopause                                          |
| 1583      | H/O: post-menopausal bleeding                            |
| 66U..11   | Hormone replacement therapy                              |
| 66UI.00   | Hormone replacement therapy bleed pattern - abnormal     |
| 66UK.00   | Hormone replacement therapy bleed pattern - no bleeding  |
| 66UH.00   | Hormone replacement therapy bleed pattern - normal       |
| 66UJ.00   | Hormone replacement therapy bleed pattern - not relevant |
| 66U9.00   | HRT changed                                              |
| 66U6.00   | HRT contraindicated                                      |
| 66U8.00   | HRT side-effects                                         |
| 66U7.00   | HRT started                                              |
| 66UA.00   | HRT stopped                                              |
| 66UC.00   | HRT: combined oestrog/progest                            |
| 66UB.00   | HRT: unopposed oestrogen                                 |
| K5Az.00   | Menopausal and postmenopausal disorder NOS               |
| 44x2.00   | Menopausal profile                                       |
| 1512      | Menopause                                                |
| 66U2.00   | Menopause follow-up assessment                           |
| 66U1.00   | Menopause initial assessment                             |
| 66U..00   | Menopause monitoring                                     |
| 66UZ.00   | Menopause monitoring NOS                                 |
| 66U3.00   | Menopause symptoms present                               |
| 66U5.00   | Menopause: bone density check                            |
| 66UD.00   | Menopause: dietary advice                                |
| 66UF.00   | Menopause: gen counselling                               |
| 66U4.00   | Menopause: LH, FSH checked                               |

|                |                                            |
|----------------|--------------------------------------------|
| <b>66UE.00</b> | Menopause: sexual advice                   |
| <b>K5Ay.00</b> | Other menopausal and postmenopausal states |
| <b>66UG.00</b> | Patient refuses HRT                        |
| <b>K5A5.00</b> | Perimenopausal atrophic vaginitis          |
| <b>K5A6.00</b> | Perimenopausal menorrhagia                 |
| <b>151K.00</b> | Postmenopausal state                       |
| <b>C163111</b> | Premature menopause NOS                    |
| <b>151J.00</b> | Premenopausal state                        |
| <b>66UL.00</b> | Years on hormone replacement therapy       |

Table S2: Hormonal Replacement Therapy Code List:

| Drug code | BNF code    | Generic name                                                | Formulation |
|-----------|-------------|-------------------------------------------------------------|-------------|
| 84485998  | 06.04.01.02 | Progesterone 200mg capsules                                 | capsules    |
| 84486998  | 06.04.01.02 | Progesterone micronised 100mg capsules                      | capsules    |
| 84704998  | 06.04.01.02 | Progesterone micronised 100mg capsules                      | capsules    |
| 84487998  | 06.04.01.02 | Progesterone micronised 200mg capsules                      | capsules    |
| 84862998  | 06.04.01.01 | Estradiol 0.06% gel (750microgram per actuation)            | gel         |
| 91399998  | 06.04.01.01 | Estradiol 0.06% gel (750microgram per actuation)            | gel         |
| 93192979  | 06.04.01.01 | Estradiol 0.06% gel (750microgram per actuation)            | gel         |
| 93193979  | 06.04.01.01 | Estradiol 0.06% gel (750microgram per actuation)            | gel         |
| 93194979  | 06.04.01.01 | Estradiol 0.06% gel (750microgram per actuation)            | gel         |
| 93195979  | 06.04.01.01 | Estradiol 0.06% gel (750microgram per actuation)            | gel         |
| 91400998  | 06.04.01.01 | Estradiol 1.25g/dose gel                                    | gel         |
| 82739998  | 06.04.01.01 | Estradiol 1mg gel sachets                                   | gel         |
| 82740998  | 06.04.01.01 | Estradiol 1mg gel sachets                                   | gel         |
| 86546979  | 06.04.01.01 | Estradiol 1mg gel sachets                                   | gel         |
| 91399997  | 06.04.01.01 | Estradiol 1mg gel sachets                                   | gel         |
| 82741998  | 06.04.01.01 | Estradiol 500microgram gel sachets                          | gel         |
| 82742998  | 06.04.01.01 | Estradiol 500microgram gel sachets                          | gel         |
| 88915998  | 06.04.01.01 | Estradiol 500microgram gel sachets                          | gel         |
| 98911996  | 06.04.01.01 | Estradiol 100mg implant                                     | implant     |
| 98911998  | 06.04.01.01 | Estradiol 25mg implant                                      | implant     |
| 95351992  | 06.04.01.01 | Estradiol 50mg implant                                      | implant     |
| 98468989  | 06.04.01.01 | Estradiol 50mg implant                                      | implant     |
| 98911997  | 06.04.01.01 | Estradiol 50mg implant                                      | implant     |
| 96748997  | 06.04.01.01 | Estradio; 5m/ml injection                                   | injection   |
| 96748998  | 06.04.01.01 | Estradiol 1mg/ml injection                                  | injection   |
| 97921998  | 06.04.01.02 | Medroxyprogesterone acetate 50mg/ml injection               | injection   |
| 95911998  | 06.04.01.02 | Medroxyprogesterone acetate contraceptive 50mg/ml injection | injection   |
| 85260998  | 06.04.01.02 | Progesterone 100mg/2ml solution for injection ampoules      | injection   |
| 85264998  | 06.04.01.02 | Progesterone 100mg/2ml solution for injection ampoules      | injection   |
| 92070998  | 06.04.01.02 | Progesterone 100mg/2ml solution for injection ampoules      | injection   |
| 95388996  | 06.04.01.02 | Progesterone 100mg/2ml solution for injection ampoules      | injection   |
| 97515992  | 06.04.01.02 | Progesterone 100mg/2ml solution for injection ampoules      | injection   |

|          |             |                                                                                                                    |                     |
|----------|-------------|--------------------------------------------------------------------------------------------------------------------|---------------------|
| 97956992 | 06.04.01.02 | Progesterone 100mg/2ml solution for injection ampoules                                                             | injection           |
| 98348996 | 06.04.01.02 | Progesterone 100mg/2ml solution for injection ampoules                                                             | injection           |
| 98348998 | 06.04.01.02 | Progesterone 10mg/1ml injection                                                                                    | injection           |
| 98348997 | 06.04.01.02 | Progesterone 25mg/1ml injection                                                                                    | injection           |
| 95388997 | 06.04.01.02 | Progesterone 25mg/1ml solution for injection ampoules                                                              | injection           |
| 85262998 | 06.04.01.02 | Progesterone 50mg/1ml solution for injection ampoules                                                              | injection           |
| 85263998 | 06.04.01.02 | Progesterone 50mg/1ml solution for injection ampoules                                                              | injection           |
| 77038978 | 06.04.01.02 | Progesterone 25mg/1.119ml solution for injection vials                                                             | injection solution  |
| 77039978 | 06.04.01.02 | Progesterone 25mg/1.119ml solution for injection vials                                                             | injection solution  |
| 88937998 | 06.04.01.01 | Estradiol 150micrograms/dose nasal spray                                                                           | nasal spray         |
| 88935998 | 06.04.01.01 | Estradiol hemihydrate 150mcg nasal spray                                                                           | nasal spray         |
| 96191998 | 06.04.01.02 | Hydroxyprogesterone 250mg/1ml solution for injection ampoules                                                      | oily injection      |
| 99207998 | 06.04.01.02 | Hydroxyprogesterone caproate 250mg/1ml oily injection                                                              | oily injection      |
| 96191997 | 06.04.01.02 | Hydroxyprogesterone caproate 500mg/2ml injection                                                                   | oily injection      |
| 99207997 | 06.04.01.02 | Hydroxyprogesterone caproate 500mg/2ml oily injection                                                              | oily injection      |
| 97759998 | 06.04.01.01 | Estradiol with (estradiol with norethisterone acetate) 50mcg/24 hr with<br>(50mcg+250mcg/24 hr) twice weekly patch | patches             |
| 89321998 | 06.04.01.01 | Generic FemSeven Sequi transdermal patches                                                                         | patches             |
| 90620998 | 06.04.01.01 | Estradiol 40micrograms/24hours transdermal patches and<br>dydrogesterone 10mg tablets                              | patches and tablets |
| 91307997 | 06.04.01.01 | Estradiol 40micrograms/24hours transdermal patches and<br>dydrogesterone 10mg tablets                              | patches and tablets |
| 92586998 | 06.04.01.01 | Estradiol 50micrograms/24hours transdermal patches and<br>norethisterone 1mg tablets                               | patches and tablets |
| 94517998 | 06.04.01.01 | Estradiol 50micrograms/24hours transdermal patches and<br>norethisterone acetate 1mg tablets                       | patches and tablets |
| 91052998 | 06.04.01.01 | Estradiol 80micrograms/24hours transdermal patches and<br>dydrogesterone 10mg tablets                              | patches and tablets |
| 91307998 | 06.04.01.01 | Estradiol 80micrograms/24hours transdermal patches and<br>dydrogesterone 10mg tablets                              | patches and tablets |
| 92585998 | 06.04.01.01 | Estradiol with norethisterone 0mcg/24hours(3.2mg/unit) with 1mg<br>patch with tablet                               | patches and tablets |
| 91680998 | 06.04.01.01 | Estradiol with norethisterone acetate 50mcg/24hours(4mg/unit) with<br>1mg patch with tablet                        | patches and tablets |
| 87543998 | 06.04.01.02 | Progesterone 200mg pessaries                                                                                       | pessaries           |

|          |             |                                                                                                                          |           |
|----------|-------------|--------------------------------------------------------------------------------------------------------------------------|-----------|
| 95390996 | 06.04.01.02 | Progesterone 200mg pessaries                                                                                             | pessaries |
| 95390998 | 06.04.01.02 | Progesterone 200mg pessaries                                                                                             | pessaries |
| 97915996 | 06.04.01.02 | Progesterone 200mg pessaries                                                                                             | pessaries |
| 97915998 | 06.04.01.02 | Progesterone 200mg pessaries                                                                                             | pessaries |
| 87542998 | 06.04.01.02 | Progesterone 400mg pessaries                                                                                             | pessaries |
| 95389998 | 06.04.01.02 | Progesterone 400mg pessaries                                                                                             | pessaries |
| 95390997 | 06.04.01.02 | Progesterone 400mg pessaries                                                                                             | pessaries |
| 97914998 | 06.04.01.02 | Progesterone 400mg pessaries                                                                                             | pessaries |
| 97915997 | 06.04.01.02 | Progesterone 400mg pessaries                                                                                             | pessaries |
| 88542998 | 06.04.01.00 | Raloxifene 60mg tablets                                                                                                  | tablets   |
| 91378998 | 06.04.01.00 | Raloxifene 60mg tablets                                                                                                  | tablets   |
| 92925979 | 06.04.01.00 | Raloxifene 60mg tablets                                                                                                  | tablets   |
| 92930979 | 06.04.01.00 | Raloxifene 60mg tablets                                                                                                  | tablets   |
| 91096998 | 06.04.01.01 | Conjugat oestrogen equi and (conjugat oestrogen equi with medroxyprogesterone acetate 625 micrograms with (625 microgram | tablets   |
| 89171979 | 06.04.01.01 | Conjugated estrogens & medroxyprogesterone 0.625mg+5mg tablets                                                           | tablets   |
| 89173979 | 06.04.01.01 | Conjugated estrogens & medroxyprogesterone 0.625mg+5mg tablets                                                           | tablets   |
| 89176979 | 06.04.01.01 | Conjugated estrogens & medroxyprogesterone 0.625mg+5mg tablets                                                           | tablets   |
| 91114998 | 06.04.01.01 | Conjugated estrogens & medroxyprogesterone 0.625mg+5mg tablets                                                           | tablets   |
| 99220996 | 06.04.01.01 | Conjugated estrogens 2.5mg tablets                                                                                       | tablets   |
| 93764992 | 06.04.01.01 | Conjugated oestrogens / norgestrel 1.25 mg tab                                                                           | tablets   |
| 96609997 | 06.04.01.01 | Conjugated oestrogens 1.25mg tablets                                                                                     | tablets   |
| 99220997 | 06.04.01.01 | Conjugated oestrogens 1.25mg tablets                                                                                     | tablets   |
| 94472997 | 06.04.01.01 | Conjugated oestrogens 1.25mg tablets and norgestrel 150microgram tablets                                                 | tablets   |
| 95698997 | 06.04.01.01 | Conjugated oestrogens 1.25mg tablets and Norgestrel 150microgram tablets                                                 | tablets   |
| 98839998 | 06.04.01.01 | Conjugated oestrogens 1.25mg tablets and Norgestrel 150microgram tablets                                                 | tablets   |
| 98840998 | 06.04.01.01 | Conjugated oestrogens 1.25mg tablets and norgestrel 150microgram tablets                                                 | tablets   |
| 96609996 | 06.04.01.01 | Conjugated oestrogens 2.5mg tablets                                                                                      | tablets   |
| 87549998 | 06.04.01.01 | Conjugated oestrogens 300microgram / Medroxyprogesterone 1.5mg modified-release tablets                                  | tablets   |

|          |             |                                                                                               |         |
|----------|-------------|-----------------------------------------------------------------------------------------------|---------|
| 87550998 | 06.04.01.01 | Conjugated oestrogens 300microgram / Medroxyprogesterone 1.5mg modified-release tablets       | tablets |
| 84780998 | 06.04.01.01 | Conjugated oestrogens 300microgram tablets                                                    | tablets |
| 84781998 | 06.04.01.01 | Conjugated oestrogens 300microgram tablets                                                    | tablets |
| 94252992 | 06.04.01.01 | Conjugated oestrogens 625/norgestrel 500 mcg tab                                              | tablets |
| 91113998 | 06.04.01.01 | Conjugated oestrogens 625microgram / medroxyprogesterone 5mg tablets                          | tablets |
| 93211979 | 06.04.01.01 | Conjugated oestrogens 625microgram tablets                                                    | tablets |
| 96609998 | 06.04.01.01 | Conjugated oestrogens 625microgram tablets                                                    | tablets |
| 99220998 | 06.04.01.01 | Conjugated oestrogens 625microgram tablets                                                    | tablets |
| 89684979 | 06.04.01.01 | Conjugated oestrogens 625microgram tablets and norgestrel 150microgram tablets                | tablets |
| 89685979 | 06.04.01.01 | Conjugated oestrogens 625microgram tablets and norgestrel 150microgram tablets                | tablets |
| 94472998 | 06.04.01.01 | Conjugated oestrogens 625microgram tablets and norgestrel 150microgram tablets                | tablets |
| 98892998 | 06.04.01.01 | Conjugated oestrogens 625microgram tablets and norgestrel 150microgram tablets                | tablets |
| 99219998 | 06.04.01.01 | Conjugated oestrogens 625microgram tablets and norgestrel 150microgram tablets                | tablets |
| 87953998 | 06.04.01.01 | Conjugated oestrogens equine with medroxyprogesterone acetate 625micrograms with 10mg tablets | tablets |
| 96392998 | 06.04.01.01 | Dienestrol 1mg tablets                                                                        | tablets |
| 96392997 | 06.04.01.01 | Dienestrol 5mg tablets                                                                        | tablets |
| 97765997 | 06.04.01.01 | Estradiol & norethisterone acetate 2mg+1mg tablets                                            | tablets |
| 86831998 | 06.04.01.01 | Estradiol 1mg / Drospirenone 2mg tablets                                                      | tablets |
| 86832998 | 06.04.01.01 | Estradiol 1mg / Drospirenone 2mg tablets                                                      | tablets |
| 88207998 | 06.04.01.01 | Estradiol 1mg / Dydrogesterone 5mg tablets                                                    | tablets |
| 88635979 | 06.04.01.01 | Estradiol 1mg / Dydrogesterone 5mg tablets                                                    | tablets |
| 88638979 | 06.04.01.01 | Estradiol 1mg / Dydrogesterone 5mg tablets                                                    | tablets |
| 89803998 | 06.04.01.01 | Estradiol 1mg / dydrogesterone 5mg tablets                                                    | tablets |
| 92171998 | 06.04.01.01 | Estradiol 1mg / Dydrogesterone 5mg tablets                                                    | tablets |
| 89399998 | 06.04.01.01 | Estradiol 1mg / Norethisterone acetate 500microgram tablets                                   | tablets |
| 91412996 | 06.04.01.01 | Estradiol 1mg / Norethisterone acetate 500microgram tablets                                   | tablets |
| 90875998 | 06.04.01.01 | Estradiol 1mg tablets                                                                         | tablets |

|          |             |                                                                                                                             |         |
|----------|-------------|-----------------------------------------------------------------------------------------------------------------------------|---------|
| 97762997 | 06.04.01.01 | Estradiol 1mg tablets                                                                                                       | tablets |
| 88320998 | 06.04.01.01 | Estradiol 2mg / Norethisterone acetate 1mg tablets                                                                          | tablets |
| 91423998 | 06.04.01.01 | Estradiol 2mg / Norethisterone acetate 1mg tablets                                                                          | tablets |
| 91862998 | 06.04.01.01 | Estradiol 2mg / Norethisterone acetate 1mg tablets                                                                          | tablets |
| 92440998 | 06.04.01.01 | Estradiol 2mg / Norethisterone acetate 1mg tablets                                                                          | tablets |
| 93174979 | 06.04.01.01 | Estradiol 2mg / Norethisterone acetate 1mg tablets                                                                          | tablets |
| 86058998 | 06.04.01.01 | Estradiol 2mg tablets                                                                                                       | tablets |
| 89953998 | 06.04.01.01 | Estradiol 2mg tablets                                                                                                       | tablets |
| 90875997 | 06.04.01.01 | Estradiol 2mg tablets                                                                                                       | tablets |
| 96747998 | 06.04.01.01 | Estradiol 2mg tablets                                                                                                       | tablets |
| 97762998 | 06.04.01.01 | Estradiol 2mg tablets                                                                                                       | tablets |
| 54611979 | 06.04.01.01 | Estradiol 500micrograms / Dydrogesterone 2.5mg tablets                                                                      | tablets |
| 91388998 | 06.04.01.01 | Estradiol and (estradiol with dydrogesterone) 1mg with (1mg with 10mg)<br>tablets                                           | tablets |
| 91388997 | 06.04.01.01 | Estradiol and (estradiol with dydrogesterone) 2mg with (2mg with 10<br>mg) tablets                                          | tablets |
| 91388996 | 06.04.01.01 | Estradiol and (estradiol with dydrogesterone) 2mg with (2mg with 20mg)<br>tablets                                           | tablets |
| 94161997 | 06.04.01.01 | Estradiol and (estradiol with norethisterone) and (estradiol) triphasic<br>forte 4mg with (4mg with 1mg) with (1mg) tablets | tablets |
| 90523998 | 06.04.01.01 | Estradiol valerate & norethisterone 2mg+0.7mg tablets                                                                       | tablets |
| 93164979 | 06.04.01.01 | Estradiol valerate & norethisterone 2mg+0.7mg tablets                                                                       | tablets |
| 93165979 | 06.04.01.01 | Estradiol valerate & norethisterone 2mg+0.7mg tablets                                                                       | tablets |
| 97625997 | 06.04.01.01 | Estradiol valerate (2mg) with norethisterone (1 mg) tablets                                                                 | tablets |
| 90618997 | 06.04.01.01 | Estradiol valerate 1mg / Medroxyprogesterone 2.5mg tablets                                                                  | tablets |
| 91350996 | 06.04.01.01 | Estradiol valerate 1mg / Medroxyprogesterone 2.5mg tablets                                                                  | tablets |
| 91350998 | 06.04.01.01 | Estradiol valerate 1mg / Medroxyprogesterone 2.5mg tablets                                                                  | tablets |
| 90618998 | 06.04.01.01 | Estradiol valerate 1mg / Medroxyprogesterone 5mg tablets                                                                    | tablets |
| 91350997 | 06.04.01.01 | Estradiol valerate 1mg / Medroxyprogesterone 5mg tablets                                                                    | tablets |
| 91859998 | 06.04.01.01 | Estradiol valerate 1mg tablets                                                                                              | tablets |
| 93341979 | 06.04.01.01 | Estradiol valerate 1mg tablets                                                                                              | tablets |
| 93696998 | 06.04.01.01 | Estradiol valerate 1mg tablets                                                                                              | tablets |
| 94737998 | 06.04.01.01 | Estradiol valerate 1mg tablets                                                                                              | tablets |
| 96747997 | 06.04.01.01 | Estradiol valerate 1mg tablets                                                                                              | tablets |

|          |             |                                                                                                          |         |
|----------|-------------|----------------------------------------------------------------------------------------------------------|---------|
| 97457998 | 06.04.01.01 | Estradiol valerate 1mg tablets                                                                           | tablets |
| 97826992 | 06.04.01.01 | Estradiol valerate 1mg tablets                                                                           | tablets |
| 90617998 | 06.04.01.01 | Estradiol valerate 2mg / Medroxyprogesterone 5mg tablets                                                 | tablets |
| 90618996 | 06.04.01.01 | Estradiol valerate 2mg / Medroxyprogesterone 5mg tablets                                                 | tablets |
| 91086998 | 06.04.01.01 | Estradiol valerate 2mg / Norethisterone 1mg tablets                                                      | tablets |
| 91412998 | 06.04.01.01 | Estradiol valerate 2mg / Norethisterone 1mg tablets                                                      | tablets |
| 91546998 | 06.04.01.01 | Estradiol valerate 2mg / Norethisterone 1mg tablets                                                      | tablets |
| 88912998 | 06.04.01.01 | Estradiol valerate 2mg / norethisterone 700microgram tablets                                             | tablets |
| 91865998 | 06.04.01.01 | Estradiol valerate 2mg tablets                                                                           | tablets |
| 93321979 | 06.04.01.01 | Estradiol valerate 2mg tablets                                                                           | tablets |
| 93325979 | 06.04.01.01 | Estradiol valerate 2mg tablets                                                                           | tablets |
| 93696997 | 06.04.01.01 | Estradiol valerate 2mg tablets                                                                           | tablets |
| 94737997 | 06.04.01.01 | Estradiol valerate 2mg tablets                                                                           | tablets |
| 97457997 | 06.04.01.01 | Estradiol valerate 2mg tablets                                                                           | tablets |
| 95657998 | 06.04.01.01 | Estradiol valerate and (estradiol valerate with levonorgestrel) 2mg with (2mg with 75micrograms) tablets | tablets |
| 97625998 | 06.04.01.01 | Estradiol valerate and (estradiol valerate with norethisterone) 1mg with (1mg with 1mg) tablets          | tablets |
| 92251998 | 06.04.01.01 | Estradiol with (estradiol with norethisterone acetate) 1mg with (1mg with 1mg) tablets                   | tablets |
| 91412997 | 06.04.01.01 | Estradiol with norethisterone acetate ( continuous combined) 2mg with 0.7mg tablets                      | tablets |
| 96744997 | 06.04.01.01 | Estriol 1mg tablets                                                                                      | tablets |
| 99295997 | 06.04.01.01 | Estriol 1mg tablets                                                                                      | tablets |
| 95363992 | 06.04.01.01 | Estriol 250mcg tablets                                                                                   | tablets |
| 99295998 | 06.04.01.01 | Estriol 250mcg tablets                                                                                   | tablets |
| 96744998 | 06.04.01.01 | Estriol 250micrograms tablets                                                                            | tablets |
| 94971998 | 06.04.01.01 | Estropipate 1.5mg tablets                                                                                | tablets |
| 99571998 | 06.04.01.01 | Estropipate 1.5mg tablets                                                                                | tablets |
| 97993998 | 06.04.01.01 | Ethinylestradiol 10microgram tablets                                                                     | tablets |
| 99602990 | 06.04.01.01 | Ethinylestradiol 10microgram tablets                                                                     | tablets |
| 93578998 | 06.04.01.01 | Ethinylestradiol 1mg tablets                                                                             | tablets |
| 97993997 | 06.04.01.01 | Ethinylestradiol 20micrograms tablet                                                                     | tablets |
| 97993996 | 06.04.01.01 | Ethinylestradiol 50microgram tablets                                                                     | tablets |

|          |             |                                                                                    |         |
|----------|-------------|------------------------------------------------------------------------------------|---------|
| 99602989 | 06.04.01.01 | Ethinylestradiol 50microgram tablets                                               | tablets |
| 98728998 | 06.04.01.01 | Ethinylestradiol with methyltestosterone 4.4micrograms + 3.6mg tablet              | tablets |
| 91328998 | 06.04.01.01 | Generic adgyn combi tablets                                                        | tablets |
| 87898979 | 06.04.01.01 | Generic climagest 1mg tablets                                                      | tablets |
| 87901979 | 06.04.01.01 | Generic climagest 1mg tablets                                                      | tablets |
| 97765998 | 06.04.01.01 | Generic climagest 1mg tablets                                                      | tablets |
| 86050998 | 06.04.01.01 | Generic Clinorette tablets                                                         | tablets |
| 97458998 | 06.04.01.01 | Generic cyclo-progynova 1mg tablets                                                | tablets |
| 94162998 | 06.04.01.01 | Generic Cyclo-Progynova 2mg tablets                                                | tablets |
| 97458997 | 06.04.01.01 | Generic Cyclo-Progynova 2mg tablets                                                | tablets |
| 90873997 | 06.04.01.01 | Generic Elleste Duet 1mg tablets                                                   | tablets |
| 90873998 | 06.04.01.01 | Generic Elleste Duet 2mg tablets                                                   | tablets |
| 91389998 | 06.04.01.01 | Generic Femoston 1/10mg tablets                                                    | tablets |
| 91389997 | 06.04.01.01 | Generic Femoston 2/10mg tablets                                                    | tablets |
| 91389996 | 06.04.01.01 | Generic femoston 2/20mg tablets                                                    | tablets |
| 83058998 | 06.04.01.01 | Generic Hormonin tablets                                                           | tablets |
| 96745998 | 06.04.01.01 | Generic Hormonin tablets                                                           | tablets |
| 96746998 | 06.04.01.01 | Generic Hormonin tablets                                                           | tablets |
| 89469998 | 06.04.01.01 | Generic Novofem tablets                                                            | tablets |
| 91864998 | 06.04.01.01 | Generic nuvelle tablets                                                            | tablets |
| 95603998 | 06.04.01.01 | Generic nuvelle tablets                                                            | tablets |
| 91097998 | 06.04.01.01 | Generic premique cycle tablets                                                     | tablets |
| 91351998 | 06.04.01.01 | Generic Tridestra tablets                                                          | tablets |
| 91479998 | 06.04.01.01 | Generic Tridestra tablets                                                          | tablets |
| 97482997 | 06.04.01.01 | Generic trisequens forte tablets                                                   | tablets |
| 94161998 | 06.04.01.01 | Generic Trisequens tablets                                                         | tablets |
| 97482998 | 06.04.01.01 | Generic Trisequens tablets                                                         | tablets |
| 98897998 | 06.04.01.01 | Mestranol with norethisterone tablet                                               | tablets |
| 95698998 | 06.04.01.01 | Norgestrel and conjugated oestrogens (equine) 150micrograms + 625micrograms tablet | tablets |
| 90770998 | 06.04.01.01 | Piperazine oestrone sulphate 1.5mg with medroxyprogesterone 10mg tablet            | tablets |
| 90771998 | 06.04.01.01 | Piperazine oestrone sulphate 1.5mg with medroxyprogesterone 10mg tablet            | tablets |

|          |             |                                           |         |
|----------|-------------|-------------------------------------------|---------|
| 97947992 | 06.04.01.01 | Premarin 0.625mg/norgestrel 0.15mg mg tab | tablets |
| 96746992 | 06.04.01.01 | Premarin 1.25mg/norgestrel 0.15mg mg tab  | tablets |
| 94309992 | 06.04.01.01 | Prempak 1.25mg mg tab                     | tablets |
| 95339998 | 06.04.01.01 | Quinestradol 250mcg tablets               | tablets |
| 93197979 | 06.04.01.01 | Tibolone 2.5mg tablets                    | tablets |
| 93201979 | 06.04.01.01 | Tibolone 2.5mg tablets                    | tablets |
| 93204979 | 06.04.01.01 | Tibolone 2.5mg tablets                    | tablets |
| 93315998 | 06.04.01.01 | Tibolone 2.5mg tablets                    | tablets |
| 93319998 | 06.04.01.01 | Tibolone 2.5mg tablets                    | tablets |
| 99594998 | 06.04.01.02 | Allylestrenol 5mg tablets                 | tablets |
| 96956998 | 06.04.01.02 | Allyoestrenol 5mg tablets                 | tablets |
| 91426998 | 06.04.01.02 | Dydrogesterone 10mg tablets               | tablets |
| 96301998 | 06.04.01.02 | Dydrogesterone 10mg tablets               | tablets |
| 99716998 | 06.04.01.02 | Dydrogesterone 10mg tablets               | tablets |
| 93186979 | 06.04.01.02 | Medroxyprogesterone 10mg tablets          | tablets |
| 95914997 | 06.04.01.02 | Medroxyprogesterone 10mg tablets          | tablets |
| 97905997 | 06.04.01.02 | Medroxyprogesterone 10mg tablets          | tablets |
| 95914996 | 06.04.01.02 | Medroxyprogesterone 2.5mg tablets         | tablets |
| 97905996 | 06.04.01.02 | Medroxyprogesterone 2.5mg tablets         | tablets |
| 92535998 | 06.04.01.02 | Medroxyprogesterone 5mg tablets           | tablets |
| 95914998 | 06.04.01.02 | Medroxyprogesterone 5mg tablets           | tablets |
| 97905998 | 06.04.01.02 | Medroxyprogesterone 5mg tablets           | tablets |
| 98910998 | 06.04.01.02 | Medroxyprogesterone 5mg tablets           | tablets |
| 92597998 | 06.04.01.02 | Norethisterone 1mg tablets                | tablets |
| 92598998 | 06.04.01.02 | Norethisterone 1mg tablets                | tablets |
| 93569998 | 06.04.01.02 | Norethisterone 5mg tablets                | tablets |
| 95701998 | 06.04.01.02 | Norethisterone 5mg tablets                | tablets |
| 96144990 | 06.04.01.02 | Norethisterone 5mg tablets                | tablets |
| 96804990 | 06.04.01.02 | Norethisterone 5mg tablets                | tablets |
| 96807990 | 06.04.01.02 | Norethisterone 5mg tablets                | tablets |
| 97578998 | 06.04.01.02 | Norethisterone 5mg tablets                | tablets |
| 97981990 | 06.04.01.02 | Norethisterone 5mg tablets                | tablets |
| 99000998 | 06.04.01.02 | Norethisterone 5mg tablets                | tablets |
| 58762979 | 06.04.01.02 | Ulipristal 5mg tablets                    | tablets |

|          |             |                                                     |                     |
|----------|-------------|-----------------------------------------------------|---------------------|
| 58763979 | 06.04.01.02 | Ulipristal 5mg tablets                              | tablets             |
| 83429998 | 06.04.01.01 | Estradiol 100micrograms/24hours transdermal patches | transdermal patches |
| 85962998 | 06.04.01.01 | Estradiol 100micrograms/24hours transdermal patches | transdermal patches |
| 85963998 | 06.04.01.01 | Estradiol 100micrograms/24hours transdermal patches | transdermal patches |
| 85973998 | 06.04.01.01 | Estradiol 100micrograms/24hours transdermal patches | transdermal patches |
| 87042998 | 06.04.01.01 | Estradiol 100micrograms/24hours transdermal patches | transdermal patches |
| 87047998 | 06.04.01.01 | Estradiol 100micrograms/24hours transdermal patches | transdermal patches |
| 88327998 | 06.04.01.01 | Estradiol 100micrograms/24hours transdermal patches | transdermal patches |
| 89082996 | 06.04.01.01 | Estradiol 100micrograms/24hours transdermal patches | transdermal patches |
| 90241996 | 06.04.01.01 | Estradiol 100micrograms/24hours transdermal patches | transdermal patches |
| 90247996 | 06.04.01.01 | Estradiol 100micrograms/24hours transdermal patches | transdermal patches |
| 90819997 | 06.04.01.01 | Estradiol 100micrograms/24hours transdermal patches | transdermal patches |
| 90834997 | 06.04.01.01 | Estradiol 100micrograms/24hours transdermal patches | transdermal patches |
| 90835996 | 06.04.01.01 | Estradiol 100micrograms/24hours transdermal patches | transdermal patches |
| 92065998 | 06.04.01.01 | Estradiol 100micrograms/24hours transdermal patches | transdermal patches |
| 92366998 | 06.04.01.01 | Estradiol 100micrograms/24hours transdermal patches | transdermal patches |
| 92962998 | 06.04.01.01 | Estradiol 100micrograms/24hours transdermal patches | transdermal patches |
| 93251979 | 06.04.01.01 | Estradiol 100micrograms/24hours transdermal patches | transdermal patches |
| 93254979 | 06.04.01.01 | Estradiol 100micrograms/24hours transdermal patches | transdermal patches |
| 93260979 | 06.04.01.01 | Estradiol 100micrograms/24hours transdermal patches | transdermal patches |
| 93262979 | 06.04.01.01 | Estradiol 100micrograms/24hours transdermal patches | transdermal patches |
| 94516996 | 06.04.01.01 | Estradiol 100micrograms/24hours transdermal patches | transdermal patches |
| 94518997 | 06.04.01.01 | Estradiol 100micrograms/24hours transdermal patches | transdermal patches |
| 89209998 | 06.04.01.01 | Estradiol 25mcg transdermal patches                 | transdermal patches |
| 60489979 | 06.04.01.01 | Estradiol 25micrograms/24hours transdermal patches  | transdermal patches |
| 60490979 | 06.04.01.01 | Estradiol 25micrograms/24hours transdermal patches  | transdermal patches |
| 83431998 | 06.04.01.01 | Estradiol 25micrograms/24hours transdermal patches  | transdermal patches |
| 85967998 | 06.04.01.01 | Estradiol 25micrograms/24hours transdermal patches  | transdermal patches |
| 85976998 | 06.04.01.01 | Estradiol 25micrograms/24hours transdermal patches  | transdermal patches |
| 87046998 | 06.04.01.01 | Estradiol 25micrograms/24hours transdermal patches  | transdermal patches |
| 87051998 | 06.04.01.01 | Estradiol 25micrograms/24hours transdermal patches  | transdermal patches |
| 89082998 | 06.04.01.01 | Estradiol 25micrograms/24hours transdermal patches  | transdermal patches |
| 90241998 | 06.04.01.01 | Estradiol 25micrograms/24hours transdermal patches  | transdermal patches |
| 90247998 | 06.04.01.01 | Estradiol 25micrograms/24hours transdermal patches  | transdermal patches |

|          |             |                                                                                              |                     |
|----------|-------------|----------------------------------------------------------------------------------------------|---------------------|
| 90834996 | 06.04.01.01 | Estradiol 25micrograms/24hours transdermal patches                                           | transdermal patches |
| 93073997 | 06.04.01.01 | Estradiol 25micrograms/24hours transdermal patches                                           | transdermal patches |
| 93293979 | 06.04.01.01 | Estradiol 25micrograms/24hours transdermal patches                                           | transdermal patches |
| 93296979 | 06.04.01.01 | Estradiol 25micrograms/24hours transdermal patches                                           | transdermal patches |
| 93303979 | 06.04.01.01 | Estradiol 25micrograms/24hours transdermal patches                                           | transdermal patches |
| 94516998 | 06.04.01.01 | Estradiol 25micrograms/24hours transdermal patches                                           | transdermal patches |
| 94518996 | 06.04.01.01 | Estradiol 25micrograms/24hours transdermal patches                                           | transdermal patches |
| 94518998 | 06.04.01.01 | Estradiol 25micrograms/24hours transdermal patches                                           | transdermal patches |
| 94519997 | 06.04.01.01 | Estradiol 25micrograms/24hours transdermal patches                                           | transdermal patches |
| 92221998 | 06.04.01.01 | Estradiol 25micrograms/24hr once weekly patch                                                | transdermal patches |
| 87045998 | 06.04.01.01 | Estradiol 37.5micrograms/24hours transdermal patches                                         | transdermal patches |
| 87050998 | 06.04.01.01 | Estradiol 37.5micrograms/24hours transdermal patches                                         | transdermal patches |
| 91090998 | 06.04.01.01 | Estradiol 37.5micrograms/24hours transdermal patches                                         | transdermal patches |
| 91620998 | 06.04.01.01 | Estradiol 37.5micrograms/24hours transdermal patches                                         | transdermal patches |
| 93352979 | 06.04.01.01 | Estradiol 37.5micrograms/24hours transdermal patches                                         | transdermal patches |
| 88828998 | 06.04.01.01 | Estradiol 40micrograms/24hours transdermal patches                                           | transdermal patches |
| 91054998 | 06.04.01.01 | Estradiol 40micrograms/24hours transdermal patches                                           | transdermal patches |
| 92962996 | 06.04.01.01 | Estradiol 40micrograms/24hours transdermal patches                                           | transdermal patches |
| 96747996 | 06.04.01.01 | Estradiol 40micrograms/24hours transdermal patches                                           | transdermal patches |
| 60462979 | 06.04.01.01 | Estradiol 50micrograms/24hours / Levonorgestrel 7micrograms/24hours<br>transdermal patches   | transdermal patches |
| 90645998 | 06.04.01.01 | Estradiol 50micrograms/24hours / Levonorgestrel 7micrograms/24hours<br>transdermal patches   | transdermal patches |
| 88889998 | 06.04.01.01 | Estradiol 50micrograms/24hours / Norethisterone<br>170micrograms/24hours transdermal patches | transdermal patches |
| 89722979 | 06.04.01.01 | Estradiol 50micrograms/24hours / Norethisterone<br>170micrograms/24hours transdermal patches | transdermal patches |
| 89723979 | 06.04.01.01 | Estradiol 50micrograms/24hours / Norethisterone<br>170micrograms/24hours transdermal patches | transdermal patches |
| 89725979 | 06.04.01.01 | Estradiol 50micrograms/24hours / Norethisterone<br>170micrograms/24hours transdermal patches | transdermal patches |
| 97759996 | 06.04.01.01 | Estradiol 50micrograms/24hours / Norethisterone<br>170micrograms/24hours transdermal patches | transdermal patches |
| 78588978 | 06.04.01.01 | Estradiol 50micrograms/24hours transdermal patches                                           | transdermal patches |



|          |             |                                                                                                       |                     |
|----------|-------------|-------------------------------------------------------------------------------------------------------|---------------------|
| 85964998 | 06.04.01.01 | Estradiol 75micrograms/24hours transdermal patches                                                    | transdermal patches |
| 85974998 | 06.04.01.01 | Estradiol 75micrograms/24hours transdermal patches                                                    | transdermal patches |
| 87043998 | 06.04.01.01 | Estradiol 75micrograms/24hours transdermal patches                                                    | transdermal patches |
| 87048998 | 06.04.01.01 | Estradiol 75micrograms/24hours transdermal patches                                                    | transdermal patches |
| 88329998 | 06.04.01.01 | Estradiol 75micrograms/24hours transdermal patches                                                    | transdermal patches |
| 88331998 | 06.04.01.01 | Estradiol 75micrograms/24hours transdermal patches                                                    | transdermal patches |
| 89209996 | 06.04.01.01 | Estradiol 75micrograms/24hours transdermal patches                                                    | transdermal patches |
| 89627998 | 06.04.01.01 | Estradiol 75micrograms/24hours transdermal patches                                                    | transdermal patches |
| 89629998 | 06.04.01.01 | Estradiol 75micrograms/24hours transdermal patches                                                    | transdermal patches |
| 90834998 | 06.04.01.01 | Estradiol 75micrograms/24hours transdermal patches                                                    | transdermal patches |
| 91090996 | 06.04.01.01 | Estradiol 75micrograms/24hours transdermal patches                                                    | transdermal patches |
| 91620996 | 06.04.01.01 | Estradiol 75micrograms/24hours transdermal patches                                                    | transdermal patches |
| 93073996 | 06.04.01.01 | Estradiol 75micrograms/24hours transdermal patches                                                    | transdermal patches |
| 93308979 | 06.04.01.01 | Estradiol 75micrograms/24hours transdermal patches                                                    | transdermal patches |
| 93311979 | 06.04.01.01 | Estradiol 75micrograms/24hours transdermal patches                                                    | transdermal patches |
| 94519996 | 06.04.01.01 | Estradiol 75micrograms/24hours transdermal patches                                                    | transdermal patches |
| 88826998 | 06.04.01.01 | Estradiol 80micrograms/24hours transdermal patches                                                    | transdermal patches |
| 91457998 | 06.04.01.01 | Estradiol 80micrograms/24hours transdermal patches                                                    | transdermal patches |
| 92962997 | 06.04.01.01 | Estradiol 80micrograms/24hours transdermal patches                                                    | transdermal patches |
| 93354979 | 06.04.01.01 | Estradiol 80micrograms/24hours transdermal patches                                                    | transdermal patches |
| 85771979 | 06.04.01.01 | Ethinylestradiol 33.9micrograms/24hours / Norelgestromin<br>203micrograms/24hours transdermal patches | transdermal patches |
| 85772979 | 06.04.01.01 | Ethinylestradiol 33.9micrograms/24hours / Norelgestromin<br>203micrograms/24hours transdermal patches | transdermal patches |
| 89295998 | 06.04.01.01 | Ethinylestradiol 33.9micrograms/24hours / Norelgestromin<br>203micrograms/24hours transdermal patches | transdermal patches |
| 91878998 | 06.04.01.01 | Ethinylestradiol 33.9micrograms/24hours / Norelgestromin<br>203micrograms/24hours transdermal patches | transdermal patches |
| 94918998 | 06.04.01.01 | Ethinylestradiol 33.9micrograms/24hours / Norelgestromin<br>203micrograms/24hours transdermal patches | transdermal patches |
| 97732998 | 06.04.01.01 | Generic estracombi tts transdermal patches                                                            | transdermal patches |
| 88887997 | 06.04.01.01 | Generic Evorel Sequi transdermal patches                                                              | transdermal patches |
| 88887998 | 06.04.01.01 | Generic Evorel Sequi transdermal patches                                                              | transdermal patches |
| 90083998 | 06.04.01.01 | Generic Evorel Sequi transdermal patches                                                              | transdermal patches |

|          |             |                                                                                                              |                     |
|----------|-------------|--------------------------------------------------------------------------------------------------------------|---------------------|
| 89216998 | 06.04.01.01 | Generic nuvelle ts transdermal patches                                                                       | transdermal patches |
| 82828978 | 06.04.01.02 | Progesterone micronised 200mg vaginal capsules                                                               | vaginal capsules    |
| 82829978 | 06.04.01.02 | Progesterone micronised 200mg vaginal capsules                                                               | vaginal capsules    |
| 88748998 | 06.04.01.02 | Progesterone 4% vaginal gel                                                                                  | vaginal gel         |
| 88752998 | 06.04.01.02 | Progesterone 4% vaginal gel 1.125g applicators                                                               | vaginal gel         |
| 88753998 | 06.04.01.02 | Progesterone 8% vaginal gel 1.125g applicators                                                               | vaginal gel         |
| 88754998 | 06.04.01.02 | Progesterone 8% vaginal gel 1.125g applicators                                                               | vaginal gel         |
| 89500998 | 06.04.01.01 | Estradiol 50mcg/24hours vaginal ring                                                                         | vaginal ring        |
| 90813998 | 06.04.01.01 | Estradiol acetate 1.25mg vaginal ring                                                                        | vaginal ring        |
| 55162978 | 06.04.01.02 | Progesterone 100mg pessaries                                                                                 | vaginal tablets     |
| 55163978 | 06.04.01.02 | Progesterone 100mg pessaries                                                                                 | vaginal tablets     |
| 90646998 | 06.04.01.01 | Estradiol 50micrograms/24hours / levonorgestrel 7micrograms/24hours<br>transdermal patches                   | Transdermal patch   |
| 91469998 | 06.04.01.01 | Estradiol and (estradiol with levonorgestrel) 50mcg/24hrs with<br>(50mcg+10mcg/24hrs) once weekly patch      | Transdermal patch   |
| 89212998 | 06.04.01.01 | Estradiol and (estradiol with levonorgestrel) 80mcg/24hrs with<br>(50mcg+20mcg/24hr) twice weekly patch      | Transdermal patch   |
| 95657997 | 06.04.01.01 | Estradiol valerate and (estradiol valerate with levonorgestrel) 1mg with<br>(1mg with 250micrograms) tablets |                     |
| 91871998 | 06.04.01.01 | Estradiol valerate with norgestrel 2mg+500micrograms tablets                                                 |                     |
| 87759998 | 06.04.01.01 | Ethinylestradiol 2microgram tablets                                                                          |                     |
| 94990992 | 06.04.01.01 | Ethinylestradiol 100 mcg tab                                                                                 |                     |
| 94156992 | 06.04.01.01 | Ethinylestradiol 15 mcg tab                                                                                  |                     |
| 93387992 | 06.04.01.01 | Ethinylestradiol 2 mcg tab                                                                                   |                     |
| 97387992 | 06.04.01.01 | Ethinylestradiol 20 mcg pes                                                                                  |                     |
| 94458992 | 06.04.01.01 | Ethinylestradiol 25 mcg tab                                                                                  |                     |
| 94989992 | 06.04.01.01 | Ethinylestradiol 30 mcg tab                                                                                  |                     |
| 97397992 | 06.04.01.01 | Ethinylestradiol 5 mcg cap                                                                                   |                     |
| 93336992 | 06.04.01.01 | Ethinylestradiol 5 mg tab                                                                                    |                     |
| 97404992 | 06.04.01.01 | Ethisterone 5 mg tab                                                                                         |                     |
| 96371992 | 06.04.01.01 | Oestradiol .01 mg tab                                                                                        |                     |
| 93461992 | 06.04.01.01 | Oestradiol 17b                                                                                               |                     |
| 89869998 | 06.04.01.01 | Phyto progesterone 1.5% cream                                                                                |                     |
| 89907998 | 06.04.01.01 | Phyto progesterone 3% cream                                                                                  |                     |

|          |             |                                                                 |                     |
|----------|-------------|-----------------------------------------------------------------|---------------------|
| 88561998 | 06.04.01.01 | Phyto progesterone cream                                        |                     |
| 89253998 | 06.04.01.01 | Phyto progesterone cream                                        |                     |
| 91560998 | 06.04.01.01 | Progesterone 1.5% cream                                         |                     |
| 89901998 | 06.04.01.01 | Progesterone 3% cream                                           |                     |
| 94361992 | 06.04.01.01 | Tace 12 mg cap                                                  |                     |
| 96673992 | 06.04.01.02 | Gestone 10 mg tab                                               |                     |
| 97514992 | 06.04.01.02 | Gestone 25 mg tab                                               |                     |
| 85179998 | 06.04.01.02 | Megestrol acetate (roi) 40mg/ml oral suspension                 |                     |
| 96751992 | 06.04.01.02 | Progesterone b.p implant 100 mg                                 |                     |
| 96073992 | 06.04.02.00 | Fluoxymesterone 5 mg tab                                        |                     |
| 95201997 | 06.04.02.00 | Generic Sustanon 250mg/1ml solution for injection ampoules      | oily injection      |
| 99089998 | 06.04.02.00 | Generic Sustanon 250mg/1ml solution for injection ampoules      | oily injection      |
| 95886998 | 06.04.02.00 | Mesterolone 25mg tablets                                        | tablets             |
| 99200998 | 06.04.02.00 | Mesterolone 25mg tablets                                        | tablets             |
| 97022997 | 06.04.02.00 | Methyltestosterone 10mg tablet                                  | tablets             |
| 97022996 | 06.04.02.00 | Methyltestosterone 25mg tablet                                  | tablets             |
| 98660996 | 06.04.02.00 | Methyltestosterone 25mg tablets                                 | tablets             |
| 93176998 | 06.04.02.00 | Methyltestosterone 50mg tablet                                  | tablets             |
| 97022998 | 06.04.02.00 | Methyltestosterone 5mg tablet                                   | tablets             |
| 83496998 | 06.04.02.00 | Saw palmetto 320mg capsule                                      |                     |
| 83498998 | 06.04.02.00 | Saw palmetto 320mg capsule                                      |                     |
| 94011992 | 06.04.02.00 | Testoral sublingual 10 mg                                       |                     |
| 98164992 | 06.04.02.00 | Testosterone 100 mg tab                                         |                     |
| 98828990 | 06.04.02.00 | Testosterone 100mg implant                                      | implant             |
| 98908998 | 06.04.02.00 | Testosterone 100mg implant                                      | implant             |
| 95204998 | 06.04.02.00 | Testosterone 10mg tablets                                       |                     |
| 84719998 | 06.04.02.00 | Testosterone 2% gel (10mg per actuation)                        | gel                 |
| 84721998 | 06.04.02.00 | Testosterone 2% gel (10mg per actuation)                        | gel                 |
| 98162992 | 06.04.02.00 | Testosterone 2% gel (10mg per actuation)                        | gel                 |
| 89777998 | 06.04.02.00 | Testosterone 2.5mg/24hours transdermal patches                  | transdermal patches |
| 89778998 | 06.04.02.00 | Testosterone 2.5mg/24hours transdermal patches                  | transdermal patches |
| 98163992 | 06.04.02.00 | Testosterone 200 mg tab                                         |                     |
| 98908997 | 06.04.02.00 | Testosterone 200mg implant                                      | implant             |
| 96483992 | 06.04.02.00 | Testosterone 25 mg tab                                          |                     |
| 84746998 | 06.04.02.00 | Testosterone 300micrograms/24hours transdermal patches          | transdermal patches |
| 84747998 | 06.04.02.00 | Testosterone 300micrograms/24hours transdermal patches          | transdermal patches |
| 87502998 | 06.04.02.00 | Testosterone 30mg buccal tablets                                | buccal tablets      |
| 87503998 | 06.04.02.00 | Testosterone 30mg modified-release muco-adhesive buccal tablets | buccal tablets      |

|          |             |                                                                   |                     |
|----------|-------------|-------------------------------------------------------------------|---------------------|
| 84085998 | 06.04.02.00 | Testosterone 40mg capsules                                        | capsules            |
| 93159979 | 06.04.02.00 | Testosterone 40mg capsules                                        | capsules            |
| 95202998 | 06.04.02.00 | Testosterone 40mg capsules                                        | capsules            |
| 99186998 | 06.04.02.00 | Testosterone 40mg capsules                                        | capsules            |
| 98661997 | 06.04.02.00 | Testosterone 50mg/1ml injection                                   | injection           |
| 78425979 | 06.04.02.00 | Testosterone 50mg/5g gel unit dose sachets                        | gel                 |
| 78426979 | 06.04.02.00 | Testosterone 50mg/5g gel unit dose sachets                        | gel                 |
| 78688979 | 06.04.02.00 | Testosterone 50mg/5g gel unit dose sachets                        | gel                 |
| 89033998 | 06.04.02.00 | Testosterone 50mg/5g gel unit dose sachets                        | gel                 |
| 91489998 | 06.04.02.00 | Testosterone 50mg/5g gel unit dose sachets                        | gel                 |
| 86907998 | 06.04.02.00 | Testosterone 50mg/5g gel unit dose tube                           | gel                 |
| 89777997 | 06.04.02.00 | Testosterone 5mg/24hours transdermal patches                      | transdermal patches |
| 89778997 | 06.04.02.00 | Testosterone 5mg/24hours transdermal patches                      | transdermal patches |
| 94585998 | 06.04.02.00 | Testosterone 5mg/24hours transdermal patches                      | transdermal patches |
| 98661996 | 06.04.02.00 | Testosterone 5mg/24hours transdermal patches                      | transdermal patches |
| 89778996 | 06.04.02.00 | Testosterone 6mg/24hours transdermal patches                      | transdermal patches |
| 90911998 | 06.04.02.00 | Testosterone 6mg/24hours transdermal patches                      | transdermal patches |
| 99216998 | 06.04.02.00 | Testosterone enantate 250mg/1ml oily injection                    | oily injection      |
| 93157979 | 06.04.02.00 | Testosterone enantate 250mg/1ml solution for injection ampoules   | oily injection      |
| 95203998 | 06.04.02.00 | Testosterone enantate 250mg/1ml solution for injection ampoules   | oily injection      |
| 96671990 | 06.04.02.00 | Testosterone enantate 250mg/1ml solution for injection ampoules   | oily injection      |
| 98721998 | 06.04.02.00 | Testosterone esters 100mg oily injection                          | oily injection      |
| 95201998 | 06.04.02.00 | Testosterone esters 100mg/ml oily injection                       | oily injection      |
| 96482992 | 06.04.02.00 | Testosterone isocap./testost.phenylprop. 40 mg inj                | oily injection      |
| 98160992 | 06.04.02.00 | Testosterone propionate 100 mg inj                                | injection           |
| 81950998 | 06.04.02.00 | Testosterone propionate 100mg/2ml solution for injection ampoules | injection           |
| 91809998 | 06.04.02.00 | Testosterone propionate 100mg/2ml solution for injection ampoules | injection           |
| 95200998 | 06.04.02.00 | Testosterone propionate 25mg/ml injection                         | injection           |
| 95200997 | 06.04.02.00 | Testosterone propionate 50mg/ml oily injection                    | injection           |
| 82223978 | 06.04.02.00 | Testosterone undecanoate 1g/4ml solution for injection vials      | injection           |
| 82224978 | 06.04.02.00 | Testosterone undecanoate 1g/4ml solution for injection vials      | injection           |
| 86959998 | 06.04.02.00 | Testosterone undecanoate 1g/4ml solution for injection vials      | injection           |
| 86960998 | 06.04.02.00 | Testosterone undecanoate 1g/4ml solution for injection vials      | injection           |

Table S3: Annual incidence rate of prescribing of HRT medicines in menopausal women

| Year                             | PYAR     | Incident users | Incidence rate per 1000 PYAR | 95% Confidence interval | Percentage change |
|----------------------------------|----------|----------------|------------------------------|-------------------------|-------------------|
| 2010                             | 1024973  | 5131           | 5.01                         | 4.87 - 5.14             | -                 |
| 2011                             | 999814.2 | 5246           | 5.25                         | 5.11 - 5.39             | 5%                |
| 2012                             | 968653   | 5262           | 5.43                         | 5.29 - 5.58             | 3%                |
| 2013                             | 917278   | 5155           | 5.62                         | 5.47 - 5.78             | 3%                |
| 2014                             | 846627.4 | 5119           | 6.05                         | 5.88 - 6.21             | 8%                |
| 2015                             | 738483   | 4623           | 6.26                         | 6.08 - 6.44             | 3%                |
| 2016                             | 632218.8 | 4443           | 7.03                         | 6.82 - 7.24             | 12%               |
| 2017                             | 554861.9 | 4843           | 8.73                         | 8.49 - 8.98             | 24%               |
| 2018                             | 500708.5 | 4688           | 9.36                         | 9.1 - 9.63              | 7%                |
| 2019                             | 452196.9 | 5295           | 11.71                        | 11.4 - 12.03            | 25%               |
| 2020                             | 381570.5 | 2983           | 7.82                         | 7.54 - 8.1              | -33%              |
| 2021                             | 270187.4 | 4906           | 18.16                        | 17.66 - 18.67           | 132%              |
| Average percentage annual change |          |                |                              |                         |                   |
| 13.64%, 95% CI 6.97 to 20.30     |          |                |                              |                         |                   |

Table S4: Annual incidence rate of prescribing of HRT in menopausal women stratified by type of HRT

| <b>Fixed combinations of Oestrogen-progesterone (OP)</b> |             |                       |                                     |                                |                          |
|----------------------------------------------------------|-------------|-----------------------|-------------------------------------|--------------------------------|--------------------------|
| <b>Year</b>                                              | <b>PYAR</b> | <b>Incident users</b> | <b>Incidence rate per 1000 PYAR</b> | <b>95% Confidence interval</b> | <b>Percentage change</b> |
| 2010                                                     | 1020327     | 3399                  | 3.33                                | 3.22 -3.45                     | -                        |
| 2011                                                     | 1022875     | 3412                  | 3.34                                | 3.23 -3.45                     | 0%                       |
| 2012                                                     | 1019828     | 3411                  | 3.34                                | 3.23 -3.46                     | 0%                       |
| 2013                                                     | 991388.2    | 3383                  | 3.41                                | 3.3 -3.53                      | 2%                       |
| 2014                                                     | 938438.1    | 3656                  | 3.9                                 | 3.77 -4.02                     | 14%                      |
| 2015                                                     | 832549.8    | 3246                  | 3.9                                 | 3.77 -4.04                     | 0%                       |
| 2016                                                     | 721988.1    | 3574                  | 4.95                                | 4.79 -5.12                     | 27%                      |
| 2017                                                     | 648847.6    | 4481                  | 6.91                                | 6.71 -7.11                     | 40%                      |
| 2018                                                     | 605596.5    | 4560                  | 7.53                                | 7.31 -7.75                     | 9%                       |
| 2019                                                     | 566830.8    | 5876                  | 10.37                               | 10.1 -10.63                    | 38%                      |
| 2020                                                     | 495364.6    | 2773                  | 5.6                                 | 5.39 -5.81                     | -46%                     |
| 2021                                                     | 363387.6    | 4444                  | 12.23                               | 11.88 -12.59                   | 118%                     |
| <b>Average percentage annual change</b>                  |             |                       |                                     |                                |                          |
| 17.6%, 95% CI 11.51 to 23.85                             |             |                       |                                     |                                |                          |
| <b>OP sequential preparations</b>                        |             |                       |                                     |                                |                          |
| <b>Year</b>                                              | <b>PYAR</b> | <b>Incident users</b> | <b>Incidence rate per 1000 PYAR</b> | <b>95% Confidence interval</b> | <b>Percentage change</b> |
| 2010                                                     | 973947.4    | 2266                  | 2.33                                | 2.23 - 2.42                    | -                        |
| 2011                                                     | 978363.4    | 2186                  | 2.23                                | 2.14 - 2.33                    | -4%                      |
| 2012                                                     | 977428.6    | 2219                  | 2.27                                | 2.18 - 2.37                    | 2%                       |
| 2013                                                     | 952407.7    | 2189                  | 2.3                                 | 2.2 - 2.4                      | 1%                       |
| 2014                                                     | 903885.2    | 2202                  | 2.44                                | 2.34 - 2.54                    | 6%                       |
| 2015                                                     | 804609.4    | 2188                  | 2.72                                | 2.61 - 2.84                    | 11%                      |
| 2016                                                     | 700003.9    | 2151                  | 3.07                                | 2.95 - 3.21                    | 13%                      |
| 2017                                                     | 630982.6    | 2280                  | 3.61                                | 3.47 - 3.76                    | 18%                      |
| 2018                                                     | 591937.6    | 1987                  | 3.36                                | 3.21 - 3.51                    | -7%                      |
| 2019                                                     | 558194.4    | 2170                  | 3.89                                | 3.73 - 4.05                    | 16%                      |
| 2020                                                     | 490795.2    | 1074                  | 2.19                                | 2.06 - 2.32                    | -44%                     |
| 2021                                                     | 362310.2    | 908                   | 2.51                                | 2.35 - 2.67                    | 15%                      |
| <b>Average percentage annual change</b>                  |             |                       |                                     |                                |                          |
| 4.39%, 95% CI 0.98 to 7.80                               |             |                       |                                     |                                |                          |
| <b>Oestrogens</b>                                        |             |                       |                                     |                                |                          |
| <b>Year</b>                                              | <b>PYAR</b> | <b>Incident users</b> | <b>Incidence rate per 1000 PYAR</b> | <b>95% Confidence interval</b> | <b>Percentage change</b> |
| 2010                                                     | 965049.8    | 2444                  | 2.53                                | 2.43 - 2.63                    | -                        |
| 2011                                                     | 969373      | 2595                  | 2.68                                | 2.58 - 2.78                    | 6%                       |
| 2012                                                     | 968588.1    | 2385                  | 2.46                                | 2.37 - 2.56                    | -8%                      |
| 2013                                                     | 943840.7    | 2249                  | 2.38                                | 2.29 - 2.48                    | -3%                      |
| 2014                                                     | 895449.7    | 2307                  | 2.58                                | 2.47 - 2.68                    | 8%                       |
| 2015                                                     | 796825.9    | 2131                  | 2.67                                | 2.56 - 2.79                    | 3%                       |
| 2016                                                     | 693840.2    | 2089                  | 3.01                                | 2.88 - 3.14                    | 13%                      |
| 2017                                                     | 626679.2    | 2373                  | 3.79                                | 3.64 - 3.94                    | 26%                      |

| <b>2018</b>                             | 588090.8    | 2473                  | 4.21                                | 4.04 - 4.37                    | 11%                      |
|-----------------------------------------|-------------|-----------------------|-------------------------------------|--------------------------------|--------------------------|
| <b>2019</b>                             | 553914.5    | 3789                  | 6.84                                | 6.63 - 7.06                    | 62%                      |
| <b>2020</b>                             | 485463.8    | 3119                  | 6.42                                | 6.2 - 6.65                     | -6%                      |
| <b>2021</b>                             | 357439      | 3802                  | 10.64                               | 10.3 - 10.98                   | 66%                      |
| <b>Average percentage annual change</b> |             |                       |                                     |                                |                          |
| 16.7%, 95% CI 10.50 to 22.80            |             |                       |                                     |                                |                          |
| <b>Progestins</b>                       |             |                       |                                     |                                |                          |
| <b>Year</b>                             | <b>PYAR</b> | <b>Incident users</b> | <b>Incidence rate per 1000 PYAR</b> | <b>95% Confidence interval</b> | <b>Percentage change</b> |
| <b>2010</b>                             | 1006999     | 1998                  | 1.98                                | 1.9 - 2.07                     | -                        |
| <b>2011</b>                             | 1003026     | 1959                  | 1.95                                | 1.87 - 2.04                    | -2%                      |
| <b>2012</b>                             | 993317.6    | 1889                  | 1.9                                 | 1.82 - 1.99                    | -3%                      |
| <b>2013</b>                             | 959832      | 1807                  | 1.88                                | 1.8 - 1.97                     | -1%                      |
| <b>2014</b>                             | 902868.7    | 1708                  | 1.89                                | 1.8 - 1.98                     | 1%                       |
| <b>2015</b>                             | 796745.7    | 1582                  | 1.99                                | 1.89 - 2.09                    | 5%                       |
| <b>2016</b>                             | 687853.8    | 1214                  | 1.76                                | 1.67 - 1.87                    | -12%                     |
| <b>2017</b>                             | 615513.7    | 1197                  | 1.94                                | 1.84 - 2.06                    | 10%                      |
| <b>2018</b>                             | 574153.7    | 1134                  | 1.98                                | 1.86 - 2.09                    | 2%                       |
| <b>2019</b>                             | 538181.3    | 1926                  | 3.58                                | 3.42 - 3.74                    | 81%                      |
| <b>2020</b>                             | 469589.3    | 2118                  | 4.51                                | 4.32 - 4.71                    | 26%                      |
| <b>2021</b>                             | 342941.9    | 2124                  | 6.19                                | 5.94 - 6.46                    | 37%                      |
| <b>Average percentage annual change</b> |             |                       |                                     |                                |                          |
| 13.24%, 95% CI 5.40 to 21.00            |             |                       |                                     |                                |                          |

Table S5: Annual incidence rate of prescribing of HRT by route of administration

| Oral formulations of HRT         |          |                |                              |                         |                   |
|----------------------------------|----------|----------------|------------------------------|-------------------------|-------------------|
| Year                             | PYAR     | Incident users | Incidence rate per 1000 PYAR | 95% Confidence interval | Percentage change |
| 2010                             | 776658.7 | 4877           | 6.28                         | 6.11 - 6.46             | -                 |
| 2011                             | 775489.2 | 4935           | 6.36                         | 6.19 - 6.54             | 1.3%              |
| 2012                             | 770017.4 | 5010           | 6.51                         | 6.33 - 6.69             | 2.4%              |
| 2013                             | 746137.2 | 4904           | 6.57                         | 6.39 - 6.76             | 0.9%              |
| 2014                             | 703538.8 | 4876           | 6.93                         | 6.74 - 7.13             | 5.5%              |
| 2015                             | 623461.7 | 4190           | 6.72                         | 6.52 - 6.93             | -3.0%             |
| 2016                             | 540964.2 | 3862           | 7.14                         | 6.92 - 7.37             | 6.3%              |
| 2017                             | 486156.8 | 3856           | 7.93                         | 7.69 - 8.19             | 11.1%             |
| 2018                             | 454263.2 | 3512           | 7.73                         | 7.48 - 7.99             | -2.5%             |
| 2019                             | 426454.3 | 4673           | 10.96                        | 10.65 - 11.28           | 41.8%             |
| 2020                             | 372572.2 | 3056           | 8.2                          | 7.92 - 8.5              | -25.2%            |
| 2021                             | 273014.7 | 2854           | 10.45                        | 10.08 - 10.84           | 27.4%             |
| Average percentage annual change |          |                |                              |                         |                   |
| 1.67%, 95% CI -0.58 to 3.92      |          |                |                              |                         |                   |
| Local formulations of HRT        |          |                |                              |                         |                   |
| Year                             | PYAR     | Incident users | Incidence rate per 1000 PYAR | 95% Confidence interval | Percentage change |
| 2010                             | 1115448  | 626            | 0.56                         | 0.52 - 0.61             | -                 |
| 2011                             | 1117796  | 715            | 0.64                         | 0.59 - 0.69             | 14.3%             |
| 2012                             | 1113831  | 603            | 0.54                         | 0.5 - 0.59              | -15.6%            |
| 2013                             | 1082218  | 467            | 0.43                         | 0.39 - 0.47             | -20.4%            |
| 2014                             | 1024639  | 465            | 0.45                         | 0.41 - 0.5              | 4.7%              |
| 2015                             | 909065.4 | 487            | 0.54                         | 0.49 - 0.59             | 20.0%             |
| 2016                             | 788467.2 | 544            | 0.69                         | 0.63 - 0.75             | 27.8%             |
| 2017                             | 709369.9 | 619            | 0.87                         | 0.81 - 0.94             | 26.1%             |
| 2018                             | 664379.6 | 886            | 1.33                         | 1.25 - 1.42             | 52.9%             |
| 2019                             | 625031.1 | 1999           | 3.2                          | 3.06 - 3.34             | 140.6%            |
| 2020                             | 547347.5 | 2060           | 3.76                         | 3.6 - 3.93              | 17.5%             |
| 2021                             | 402725.8 | 2382           | 5.91                         | 5.68 - 6.16             | 57.2%             |
| Average percentage annual change |          |                |                              |                         |                   |
| 34.11%, 95% CI 20.67 to 47.56    |          |                |                              |                         |                   |
| Transdermal formulations of HRT  |          |                |                              |                         |                   |
| Year                             | PYAR     | Incident users | Incidence rate per 1000 PYAR | 95% Confidence interval | Percentage change |
| 2010                             | 1045147  | 1546           | 1.48                         | 1.41 - 1.55             | -                 |
| 2011                             | 1048583  | 1669           | 1.59                         | 1.52 - 1.67             | 7.4%              |
| 2012                             | 1046217  | 1533           | 1.47                         | 1.39 - 1.54             | -7.5%             |
| 2013                             | 1017653  | 1598           | 1.57                         | 1.5 - 1.65              | 6.8%              |
| 2014                             | 963992.3 | 1682           | 1.74                         | 1.66 - 1.83             | 10.8%             |
| 2015                             | 855527.7 | 1697           | 1.98                         | 1.89 - 2.08             | 13.8%             |
| 2016                             | 742027.7 | 2306           | 3.11                         | 2.98 - 3.24             | 57.1%             |
| 2017                             | 667647.4 | 3286           | 4.92                         | 4.76 - 5.09             | 58.2%             |
| 2018                             | 623474.1 | 3837           | 6.15                         | 5.96 - 6.35             | 25.0%             |

|                                         |          |      |       |               |        |
|-----------------------------------------|----------|------|-------|---------------|--------|
| <b>2019</b>                             | 584067.9 | 4799 | 8.22  | 7.99 - 8.45   | 33.7%  |
| <b>2020</b>                             | 510607.6 | 2460 | 4.82  | 4.63 - 5.01   | -41.4% |
| <b>2021</b>                             | 373830.5 | 5439 | 14.55 | 14.17 - 14.94 | 201.9% |
| <b>Average percentage annual change</b> |          |      |       |               |        |
| 31.51%, 95% CI 20.90 to 42.12           |          |      |       |               |        |

Table S6: Annual incidence rate of prescribing of testosterone in menopausal women

| Year                                    | PYAR     | Incident users | Incidence rate per 1000 PYAR | 95% Confidence interval | Percentage change |
|-----------------------------------------|----------|----------------|------------------------------|-------------------------|-------------------|
| 2010                                    | 1129420  | 182            | 0.16                         | 0.14 - 0.19             | -                 |
| 2011                                    | 1132169  | 179            | 0.16                         | 0.14 - 0.18             | 0%                |
| 2012                                    | 1128491  | 163            | 0.14                         | 0.12 - 0.17             | -13%              |
| 2013                                    | 1096854  | 86             | 0.08                         | 0.06 - 0.1              | -43%              |
| 2014                                    | 1038726  | 104            | 0.1                          | 0.08 - 0.12             | 25%               |
| 2015                                    | 921423.4 | 84             | 0.09                         | 0.07 - 0.11             | -10%              |
| 2016                                    | 799220   | 103            | 0.13                         | 0.11 - 0.16             | 44%               |
| 2017                                    | 719253   | 136            | 0.19                         | 0.16 - 0.22             | 46%               |
| 2018                                    | 674166.1 | 107            | 0.16                         | 0.13 - 0.19             | -16%              |
| 2019                                    | 635091.2 | 114            | 0.18                         | 0.15 - 0.22             | 13%               |
| 2020                                    | 558007.8 | 88             | 0.16                         | 0.13 - 0.19             | -11%              |
| 2021                                    | 411455.5 | 135            | 0.33                         | 0.28 - 0.39             | 106%              |
| <b>Average percentage annual change</b> |          |                |                              |                         |                   |
| 13%, 95% CI 5.20 to 20.81               |          |                |                              |                         |                   |

Table S7: Annual incidence rate of prescribing of HRT by age group

| <b>50-59 years old</b>                  |            |                |                              |                         |                   |
|-----------------------------------------|------------|----------------|------------------------------|-------------------------|-------------------|
| Year                                    | PYAR       | Incident users | Incidence rate per 1000 PYAR | 95% Confidence interval | Percentage change |
| 2010                                    | 217,437.43 | 4168           | 19.17                        | 18.6 - 19.76            | -                 |
| 2011                                    | 222,947.38 | 4154           | 18.63                        | 18.07 - 19.21           | -2.8%             |
| 2012                                    | 227,179.65 | 4337           | 19.09                        | 18.53 - 19.67           | 2.5%              |
| 2013                                    | 225,845.85 | 4316           | 19.11                        | 18.55 - 19.69           | 0.1%              |
| 2014                                    | 193,374.55 | 4387           | 22.69                        | 22.03 - 23.37           | 18.7%             |
| 2015                                    | 196,315.04 | 3910           | 19.92                        | 19.3 - 20.55            | -12.2%            |
| 2016                                    | 172,848.39 | 3800           | 21.98                        | 21.3 - 22.69            | 10.3%             |
| 2017                                    | 156,709.04 | 4229           | 26.99                        | 26.19 - 27.81           | 22.8%             |
| 2018                                    | 145,419.95 | 4085           | 28.09                        | 27.24 - 28.97           | 4.1%              |
| 2019                                    | 134,123.23 | 4653           | 34.69                        | 33.71 - 35.7            | 23.5%             |
| 2020                                    | 115,622.43 | 2603           | 22.51                        | 21.66 - 23.39           | -35.1%            |
| 2021                                    | 82,320.87  | 4454           | 54.11                        | 52.54 - 55.72           | 140.4%            |
| <b>Average percentage annual change</b> |            |                |                              |                         |                   |
| 11.71%, 95% CI 4.45 to 18.98            |            |                |                              |                         |                   |
| <b>60-69 years old</b>                  |            |                |                              |                         |                   |
| Year                                    | PYAR       | Incident users | Incidence rate per 1000 PYAR | 95% Confidence interval | Percentage change |
| 2010                                    | 178,985.51 | 251            | 1.4                          | 1.24 - 1.59             | -                 |
| 2011                                    | 180,296.73 | 270            | 1.5                          | 1.33 - 1.69             | 7.1%              |
| 2012                                    | 179,827.19 | 225            | 1.25                         | 1.1 - 1.43              | -16.7%            |
| 2013                                    | 175,680.30 | 203            | 1.16                         | 1.01 - 1.33             | -7.2%             |
| 2014                                    | 165,732.18 | 201            | 1.21                         | 1.06 - 1.39             | 4.3%              |
| 2015                                    | 149,744.29 | 200            | 1.34                         | 1.16 - 1.53             | 10.7%             |

| <b>2016</b>                      | 130,898.91  | 185                   | 1.41                                | 1.22 - 1.63                    | 5.2%                     |
|----------------------------------|-------------|-----------------------|-------------------------------------|--------------------------------|--------------------------|
| <b>2017</b>                      | 117,558.60  | 197                   | 1.68                                | 1.46 - 1.93                    | 19.1%                    |
| <b>2018</b>                      | 111,110.79  | 189                   | 1.7                                 | 1.47 - 1.96                    | 1.2%                     |
| <b>2019</b>                      | 106,280.15  | 221                   | 2.08                                | 1.82 - 2.37                    | 22.4%                    |
| <b>2020</b>                      | 95,835.81   | 108                   | 1.13                                | 0.93 - 1.36                    | -45.7%                   |
| <b>2021</b>                      | 72,031.57   | 172                   | 2.39                                | 2.06 - 2.77                    | 111.5%                   |
| Average percentage annual change |             |                       |                                     |                                |                          |
| 7.73%, 95% CI 1.72 to 13.74      |             |                       |                                     |                                |                          |
| <b>70-79 years old</b>           |             |                       |                                     |                                |                          |
| <b>Year</b>                      | <b>PYAR</b> | <b>Incident users</b> | <b>Incidence rate per 1000 PYAR</b> | <b>95% Confidence interval</b> | <b>Percentage change</b> |
| <b>2010</b>                      | 173396.93   | 86                    | 0.5                                 | 0.4 - 0.61                     | -                        |
| <b>2011</b>                      | 166652.25   | 109                   | 0.65                                | 0.54 - 0.79                    | 30.0%                    |
| <b>2012</b>                      | 160924.89   | 92                    | 0.57                                | 0.47 - 0.7                     | -12.3%                   |
| <b>2013</b>                      | 152990.68   | 76                    | 0.5                                 | 0.4 - 0.62                     | -12.3%                   |
| <b>2014</b>                      | 142041.43   | 57                    | 0.4                                 | 0.31 - 0.52                    | -20.0%                   |
| <b>2015</b>                      | 122826.83   | 70                    | 0.57                                | 0.45 - 0.72                    | 42.5%                    |
| <b>2016</b>                      | 106256.61   | 62                    | 0.58                                | 0.45 - 0.75                    | 1.8%                     |
| <b>2017</b>                      | 96587.35    | 49                    | 0.51                                | 0.38 - 0.67                    | -12.1%                   |
| <b>2018</b>                      | 90719.42    | 57                    | 0.63                                | 0.48 - 0.81                    | 23.5%                    |
| <b>2019</b>                      | 85584.63    | 46                    | 0.54                                | 0.4 - 0.72                     | -14.3%                   |
| <b>2020</b>                      | 75554.76    | 25                    | 0.33                                | 0.22 - 0.49                    | -38.9%                   |
| <b>2021</b>                      | 56014.3     | 17                    | 0.3                                 | 0.19 - 0.49                    | -9.1%                    |
| Average percentage annual change |             |                       |                                     |                                |                          |
| -1.9%, 95% CI -6.46 to 2.65      |             |                       |                                     |                                |                          |
| <b>&gt;80 years old</b>          |             |                       |                                     |                                |                          |
| <b>Year</b>                      | <b>PYAR</b> | <b>Incident users</b> | <b>Incidence rate per 1000 PYAR</b> | <b>95% Confidence interval</b> | <b>Percentage change</b> |
| <b>2010</b>                      | 166772.23   | 84                    | 0.5                                 | 0.41 - 0.62                    | -                        |
| <b>2011</b>                      | 165729.37   | 89                    | 0.54                                | 0.44 - 0.66                    | 8.0%                     |
| <b>2012</b>                      | 162913.54   | 77                    | 0.47                                | 0.38 - 0.59                    | -13.0%                   |
| <b>2013</b>                      | 154074.5    | 59                    | 0.38                                | 0.3 - 0.49                     | -19.1%                   |
| <b>2014</b>                      | 143869.92   | 45                    | 0.31                                | 0.23 - 0.42                    | -18.4%                   |
| <b>2015</b>                      | 123574.51   | 55                    | 0.45                                | 0.34 - 0.58                    | 45.2%                    |
| <b>2016</b>                      | 104064.94   | 40                    | 0.38                                | 0.28 - 0.52                    | -15.6%                   |
| <b>2017</b>                      | 91167.53    | 27                    | 0.3                                 | 0.2 - 0.43                     | -21.1%                   |
| <b>2018</b>                      | 83442.81    | 29                    | 0.35                                | 0.24 - 0.5                     | 16.7%                    |
| <b>2019</b>                      | 77211.63    | 24                    | 0.31                                | 0.21 - 0.46                    | -11.4%                   |
| <b>2020</b>                      | 65501.7     | 25                    | 0.38                                | 0.26 - 0.56                    | 22.6%                    |
| <b>2021</b>                      | 47237.25    | 11                    | 0.23                                | 0.13 - 0.42                    | -39.5%                   |
| Average percentage annual change |             |                       |                                     |                                |                          |
| -2.48%, 95% CI -6.09 to 1.13     |             |                       |                                     |                                |                          |

Table S8: Annual prescribing prevalence of HRT medicines in menopausal women

| Year                             | Prevalent Users | Mid-year population | Prevalence Per 100 persons | Percentage change |
|----------------------------------|-----------------|---------------------|----------------------------|-------------------|
| 2010                             | 109246          | 1385241             | 7.89                       | -                 |
| 2011                             | 102429          | 1369766             | 7.48                       | -5%               |
| 2012                             | 95673           | 1339055             | 7.14                       | -4%               |
| 2013                             | 89081           | 1282937             | 6.94                       | -3%               |
| 2014                             | 81696           | 1199968             | 6.81                       | -2%               |
| 2015                             | 71215           | 1048547             | 6.79                       | 0%                |
| 2016                             | 59378           | 896120              | 6.63                       | -2%               |
| 2017                             | 53181           | 796059              | 6.68                       | 1%                |
| 2018                             | 50749           | 736119              | 6.89                       | 3%                |
| 2019                             | 50761           | 682658              | 7.44                       | 8%                |
| 2020                             | 40896           | 596105              | 6.86                       | -8%               |
| Average percentage annual change |                 |                     |                            |                   |
| -0.38%, 95% CI -1.4 to 0.79      |                 |                     |                            |                   |
